# Supplementary material for: Botryllin, a Novel Antimicrobial Peptide from the Colonial Ascidian Botryllus schlosseri
Source: MDPI journal article supplement (doi:10.3390/md21020074), 2023-01-21
Supplement: s1 [file s1]

## Supplementary Information

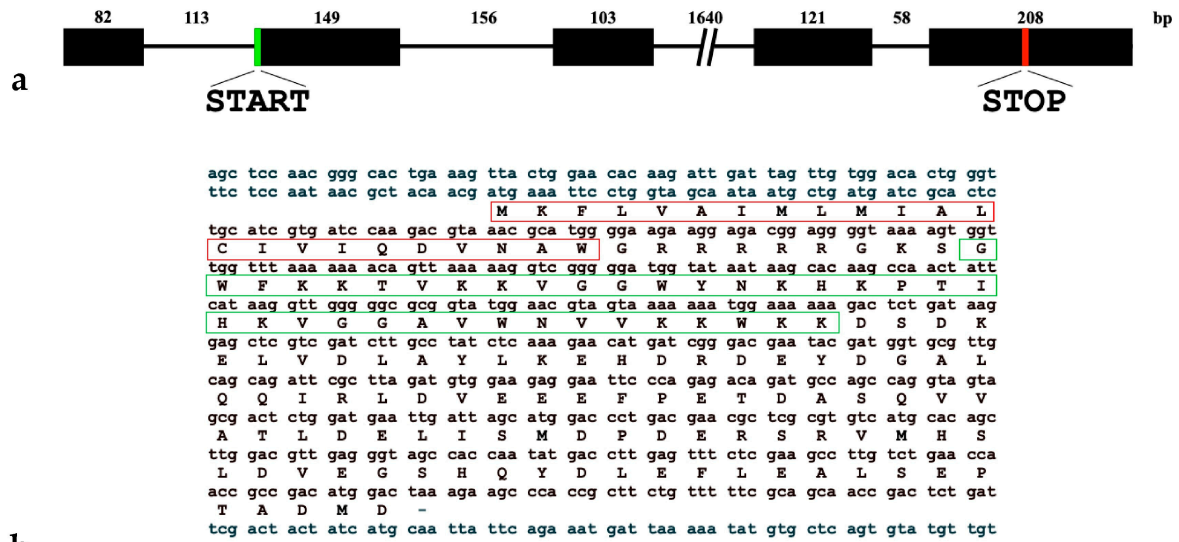

**Figure S1.** (a) Gene organisation of botryllin. (b) Nucleotide and amino acid sequences of the pre-propeptide transcript. The signal peptide and the mature peptide are boxed red and green, respectively.
